# Supplementary material
Source: publisher figshare collection journal article supplement (https://brill.figshare.com/articles/dataset/_/24304615)
Supplement: Supplementary file 1 [file 2]

## Sheet: TableA1
Table A1. Information of snail individuals used in each experiment.
Individual ID	Species	Collected date	Whole weight (g)	Shell width (mm)	Lab experiments under ordinary conditions		Lab experiment under	Field experiment
					Vertical direction	Horizontal direction	stimulated condition
1) Laboratory experiments: measurements of crawling speeds
Ordinary conditions
Ke-2018-01	K. editha	26-May-2018	2.30	21.80	f (did not move enough)	n	–	–
Ke-2018-02	K. editha	26-May-2018	2.55	22.80	u	u	–	–
Ke-2018-03	K. editha	26-May-2018	2.55	21.51	u	f (did not move enough)	–	–
Ke-2018-04	K. editha	26-May-2018	2.86	23.21	u	u	–	–
Ke-2018-05	K. editha	26-May-2018	2.89	24.66	u	n	–	–
Ke-2018-06	K. editha	26-May-2018	2.61	21.79	u	n	–	–
Ke-2018-07	K. editha	26-May-2018	–	–	n (died in lab)	n (died in lab)	–	–
Ke-2018-08	K. editha	26-May-2018	2.62	22.68	f (did not move enough)	u	–	–
Ke-2018-09	K. editha	26-May-2018	2.22	22.32	u	n	–	–
Ke-2018-10	K. editha	26-May-2018	2.90	22.54	u	u	–	–
Ke-2018-11	K. editha	26-May-2018	2.40	22.36	u	n	–	–
Ke-2018-12	K. editha	26-May-2018	3.34	22.25	u	u	–	–
Ke-2018-13	K. editha	26-May-2018	3.38	23.13	u	u	–	–
Ke-2018-14	K. editha	26-May-2018	2.71	21.56	u	n	–	–
Ke-2018-15	K. editha	26-May-2018	2.66	22.09	u	n	–	–
Ke-2018-16	K. editha	26-May-2018	2.46	20.39	u	n	–	–
Ke-2018-17	K. editha	26-May-2018	2.43	21.85	u	n	–	–
Ke-2018-18	K. editha	26-May-2018	–	–	n (died in lab)	n (died in lab)	–	–
Ke-2018-19	K. editha	26-May-2018	2.30	22.19	f (did not move enough)	f (did not move enough)	–	–
Ke-2018-20	K. editha	26-May-2018	3.02	21.79	f (did not move enough)	f (did not move enough)	–	–
Ke-2018-21	K. editha	26-May-2018	–	–	n (died in lab)	n (died in lab)	–	–
Ke-2018-22	K. editha	26-May-2018	2.29	27.56	u	u	–	–
Kg-2018-01	K. gainesi	26-May-2018	14.10	34.59	u	n	–	–
Kg-2018-02	K. gainesi	26-May-2018	11.18	34.12	u	u	–	–
Kg-2018-03	K. gainesi	26-May-2018	12.07	34.62	u	u	–	–
Kg-2018-04	K. gainesi	26-May-2018	14.71	35.24	u	n	–	–
Kg-2018-05	K. gainesi	26-May-2018	12.41	35.04	u	n	–	–
Kg-2018-06	K. gainesi	26-May-2018	10.16	38.71	u	n	–	–
Kg-2018-07	K. gainesi	26-May-2018	8.77	30.22	u	n	–	–
Kg-2018-08	K. gainesi	26-May-2018	11.33	34.45	u	n	–	–
Kg-2018-09	K. gainesi	26-May-2018	10.07	33.21	u	u	–	–
Kg-2018-10	K. gainesi	26-May-2018	11.24	31.93	f (did not move enough)	n	–	–
Kg-2018-11	K. gainesi	26-May-2018	13.90	33.61	f (turned in the middle)	u	–	–
Kg-2018-12	K. gainesi	26-May-2018	8.40	30.98	u	n	–	–
Kg-2018-13	K. gainesi	26-May-2018	7.68	28.92	u	f (did not move enough)	–	–
Kg-2018-14	K. gainesi	26-May-2018	10.25	34.50	u	u	–	–
Kg-2018-15	K. gainesi	26-May-2018	13.77	35.56	n	u	–	–
Kg-2018-16	K. gainesi	26-May-2018	11.03	33.11	u	u	–	–
Kg-2018-17	K. gainesi	26-May-2018	11.18	30.73	u	n	–	–
Kg-2018-18	K. gainesi	26-May-2018	11.86	32.70	u	n	–	–
Kg-2018-19	K. gainesi	26-May-2018	–	–	n (escaped in lab)	n (escaped in lab)	–	–
Kg-2018-20	K. gainesi	26-May-2018	10.68	34.47	u	n	–	–
Kg-2018-21	K. gainesi	26-May-2018	9.53	32.00	n (died in lab)	n (died in lab)	–	–
Kg-2018-22	K. gainesi	26-May-2018	10.67	33.85	u	u	–	–
Kg-2018-23	K. gainesi	26-May-2018	11.62	31.12	u	u	–	–
Kg-2018-24	K. gainesi	26-May-2018	10.70	33.30	u	u	–	–
Kg-2018-25	K. gainesi	26-May-2018	11.40	34.02	u	n	–	–
Kg-2018-26	K. gainesi	26-May-2018	11.89	34.85	u	n	–	–
Kg-2018-27	K. gainesi	26-May-2018	13.81	36.44	u	n	–	–
Kg-2018-28	K. gainesi	26-May-2018	12.19	36.70	u	n	–	–
Kg-2018-29	K. gainesi	26-May-2018	7.75	30.16	u	n	–	–
Kg-2018-30	K. gainesi	26-May-2018	11.37	33.55	u	n	–	–
Kg-2018-31	K. gainesi	26-May-2018	8.62	32.59	u	n	–	–
Kg-2018-32	K. gainesi	26-May-2018	10.00	33.12	u	u	–	–
Stimulated condition
Ke-2019-01	K. editha	25-May-2019	–	–	–	–	f (did not move enough)	–
Ke-2019-02	K. editha	25-May-2019	2.53	21	–	–	u	–
Ke-2019-03	K. editha	25-May-2019	2.26	22	–	–	u	–
Ke-2019-04	K. editha	25-May-2019	2.21	20	–	–	u	–
Ke-2019-05	K. editha	25-May-2019	2.52	21	–	–	u	–
Ke-2019-06	K. editha	25-May-2019	–	–	–	–	f (did not move enough)	–
Ke-2019-07	K. editha	25-May-2019	3.12	21	–	–	u	–
Ke-2019-08	K. editha	25-May-2019	–	–	–	–	f (did not move enough)	–
Ke-2019-09	K. editha	25-May-2019	2.74	22	–	–	u	–
Ke-2019-10	K. editha	25-May-2019	–	–	–	–	f (did not move enough)	–
Ke-2019-11	K. editha	25-May-2019	2.25	21	–	–	u	–
Ke-2019-12	K. editha	25-May-2019	3.43	22	–	–	u	–
Ke-2019-13	K. editha	25-May-2019	2.56	20	–	–	u	–
Ke-2019-14	K. editha	25-May-2019	2.46	22	–	–	u	–
Ke-2019-15	K. editha	25-May-2019	–	–	–	–	f (did not move enough)	–
Ke-2019-16	K. editha	25-May-2019	–	–	–	–	f (did not move enough)	–
Ke-2019-17	K. editha	25-May-2019	2.70	22	–	–	u	–
Ke-2019-18	K. editha	25-May-2019	–	–	–	–	f (did not move enough)	–
Ke-2019-19	K. editha	25-May-2019	2.78	22	–	–	u	–
Kg-2019-01	K. gainesi	25-May-2019	12.57	35	–	–	u	–
Kg-2019-02	K. gainesi	25-May-2019	–	–	–	–	f (turned in the middle)	–
Kg-2019-03	K. gainesi	25-May-2019	11.80	33	–	–	u	–
Kg-2019-04	K. gainesi	25-May-2019	5.39	23	–	–	u	–
Kg-2019-05	K. gainesi	25-May-2019	11.42	33	–	–	u	–
Kg-2019-06	K. gainesi	25-May-2019	7.10	29	–	–	u	–
Kg-2019-07	K. gainesi	25-May-2019	13.09	34	–	–	u	–
Kg-2019-08	K. gainesi	25-May-2019	8.01	29	–	–	u	–
Kg-2019-09	K. gainesi	25-May-2019	9.48	31	–	–	u	–
Kg-2019-10	K. gainesi	25-May-2019	10.08	32	–	–	u	–
Kg-2019-11	K. gainesi	25-May-2019	15.00	36	–	–	u	–
Kg-2019-12	K. gainesi	25-May-2019	10.50	32	–	–	u	–
Kg-2019-13	K. gainesi	25-May-2019	13.31	33	–	–	u	–
Kg-2019-14	K. gainesi	25-May-2019	–	–	–	–	f (turned in the middle)	–
Kg-2019-15	K. gainesi	25-May-2019	9.61	30	–	–	u	–
Kg-2019-16	K. gainesi	25-May-2019	9.26	30	–	–	u	–
Kg-2019-17	K. gainesi	25-May-2019	8.16	29	–	–	u	–
2) Field experiment: observations of exploration and activity
Ke-2015-01	K. editha	08-Aug-2015	1.25	20.29	–	–	–	u
Ke-2015-02	K. editha	08-Aug-2015	1.57	19.91	–	–	–	u
Ke-2015-03	K. editha	08-Aug-2015	2.40	23.22	–	–	–	u
Ke-2015-04	K. editha	08-Aug-2015	2.03	22.01	–	–	–	u
Ke-2015-05	K. editha	08-Aug-2015	1.63	20.99	–	–	–	u
Ke-2015-06	K. editha	08-Aug-2015	2.30	21.86	–	–	–	u
Ke-2015-07	K. editha	08-Aug-2015	1.94	21.46	–	–	–	u
Ke-2015-08	K. editha	08-Aug-2015	1.81	21.59	–	–	–	u
Ke-2015-09	K. editha	08-Aug-2015	2.01	21.54	–	–	–	u
Ke-2015-10	K. editha	08-Aug-2015	2.38	23.65	–	–	–	u
Kg-2015-01	K. gainesi	08-Aug-2015	6.54	32.54	–	–	–	u
Kg-2015-02	K. gainesi	08-Aug-2015	8.89	33.65	–	–	–	u
Kg-2015-03	K. gainesi	08-Aug-2015	7.22	32.14	–	–	–	u
Kg-2015-04	K. gainesi	08-Aug-2015	6.13	30.74	–	–	–	u
Kg-2015-05	K. gainesi	08-Aug-2015	5.70	30.01	–	–	–	u
Kg-2015-06	K. gainesi	08-Aug-2015	7.01	32.55	–	–	–	u
Kg-2015-07	K. gainesi	08-Aug-2015	6.51	32.27	–	–	–	u
Kg-2015-08	K. gainesi	08-Aug-2015	6.45	31.80	–	–	–	u
Kg-2015-09	K. gainesi	08-Aug-2015	4.37	29.77	–	–	–	u
Kg-2015-10	K. gainesi	08-Aug-2015	6.94	32.81	–	–	–	u
Note: u. used as a data; f. used in the experiment but failed (did not move enough, or turned in the middle); n. did not used in the experiment (died or escaped in laboratory, or just not used).

## Sheet: TableA2
Table A2. The dataset of the laboratory experiments under ordinary conditions in this study.
Individual ID	Snail species	Observed date	Observed condition		Crawling speed
			Temperature (°C)	Humidity (%)	(mm/min)
1) Ordinary conditions
Vertical direction
Ke-2018-02	K. editha	22-Jun-2018	27	82	51.2
Ke-2018-03	K. editha	08-Jul-2018	28	67	27
Ke-2018-04	K. editha	30-Jun-2018	27	83	52
Ke-2018-05	K. editha	27-Jun-2018	25	78	39
Ke-2018-06	K. editha	23-Jun-2018	27	69	40.8
Ke-2018-09	K. editha	30-Jun-2018	27	86	43.2
Ke-2018-10	K. editha	23-Jun-2018	28	65	34
Ke-2018-11	K. editha	30-Jun-2018	27	87	30.8
Ke-2018-12	K. editha	30-Jun-2018	27	87	54.2
Ke-2018-13	K. editha	29-Jun-2018	28	87	11.8
Ke-2018-14	K. editha	21-Jun-2018	28	82	68.6
Ke-2018-15	K. editha	08-Jul-2018	27	80	21
Ke-2018-16	K. editha	03-Jul-2018	27	90	26.8
Ke-2018-17	K. editha	03-Jul-2018	27	89	25.6
Ke-2018-22	K. editha	01-Jul-2018	27	85	33.6
Kg-2018-01	K. gainesi	20-Jun-2018	28	81	40.4
Kg-2018-02	K. gainesi	23-Jun-2018	25	68	76.8
Kg-2018-03	K. gainesi	22-Jun-2018	25	73	58.8
Kg-2018-04	K. gainesi	23-Jun-2018	27	74	26
Kg-2018-05	K. gainesi	18-Jun-2018	25	71	49.4
Kg-2018-06	K. gainesi	23-Jun-2018	29	73	39.8
Kg-2018-07	K. gainesi	27-Jun-2018	23	67	32.8
Kg-2018-08	K. gainesi	30-Jun-2018	27	86	59
Kg-2018-09	K. gainesi	30-Jun-2018	26	86	62.2
Kg-2018-12	K. gainesi	04-Jul-2018	28	83	29
Kg-2018-13	K. gainesi	04-Jul-2018	28	89	40
Kg-2018-14	K. gainesi	11-Jul-2018	25	84	71
Kg-2018-16	K. gainesi	06-Jul-2018	26	83	48
Kg-2018-17	K. gainesi	22-Jun-2018	25	71	55.6
Kg-2018-18	K. gainesi	06-Jul-2018	25	79	39.6
Kg-2018-20	K. gainesi	07-Jul-2018	26	83	33
Kg-2018-22	K. gainesi	07-Jul-2018	26	80	43.6
Kg-2018-23	K. gainesi	07-Jul-2018	26	83	31.4
Kg-2018-24	K. gainesi	07-Jul-2018	26	82	67.4
Kg-2018-25	K. gainesi	30-Jun-2018	25	85	44.6
Kg-2018-26	K. gainesi	07-Jul-2018	25	87	27
Kg-2018-27	K. gainesi	07-Jul-2018	26	83	34.4
Kg-2018-28	K. gainesi	07-Jul-2018	27	90	33.4
Kg-2018-29	K. gainesi	07-Jul-2018	25	87	64.2
Kg-2018-30	K. gainesi	07-Jul-2018	25	87	41.8
Kg-2018-31	K. gainesi	07-Jul-2018	25	89	58
Kg-2018-32	K. gainesi	07-Jul-2018	25	80	33.4
Horisontal direction
Ke-2018-02	K. editha	17-Jul-2018	25–29	65–90	45.4
Ke-2018-04	K. editha	20-Jul-2018	25–29	65–90	25.2
Ke-2018-08	K. editha	17-Jul-2018	25–29	65–90	38.4
Ke-2018-10	K. editha	17-Jul-2018	25–29	65–90	16.6
Ke-2018-12	K. editha	20-Jul-2018	25–29	65–90	51.6
Ke-2018-13	K. editha	17-Jul-2018	25–29	65–90	38.6
Ke-2018-22	K. editha	17-Jul-2018	25–29	65–90	41.6
Kg-2018-02	K. gainesi	26-Jul-2018	25–29	65–90	47.2
Kg-2018-03	K. gainesi	17-Jul-2018	25–29	65–90	44
Kg-2018-09	K. gainesi	26-Jul-2018	25–29	65–90	42.6
Kg-2018-11	K. gainesi	23-Jul-2018	25–29	65–90	55.8
Kg-2018-14	K. gainesi	27-Jul-2018	25–29	65–90	66.2
Kg-2018-15	K. gainesi	27-Jul-2018	25–29	65–90	43.2
Kg-2018-16	K. gainesi	27-Jul-2018	25–29	65–90	64.8
Kg-2018-22	K. gainesi	19-Jul-2018	25–29	65–90	54.6
Kg-2018-23	K. gainesi	19-Jul-2018	25–29	65–90	63.4
Kg-2018-24	K. gainesi	19-Jul-2018	25–29	65–90	52.2
Kg-2018-32	K. gainesi	19-Jul-2018	25–29	65–90	42.4

## Sheet: TableA3
Table A3. The dataset of the laboratory experiments under stimulated conditions in this study.
Individual ID	Snail species	Observed date	Observed condition		Crawling speed (mm/min)			Number of shell swinging
			Temperature (°C)	Humidity (%)	-1~0 min	0~1 min	4~5 min	after stimulation
2) Stimulated condition (vertical direction)
Ke-2019-02	K. editha	29-Jun-2019	27	63	35	–	–	–
Ke-2019-03	K. editha	20-Jul-2019	30	67	36	–	–	–
Ke-2019-04	K. editha	20-Jul-2019	30	65	33	–	–	–
Ke-2019-05	K. editha	20-Jul-2019	30	66	36	–	–	–
Ke-2019-07	K. editha	20-Jul-2019	31	76	32	–	–	–
Ke-2019-09	K. editha	29-Jun-2019	27	64	38	–	–	–
Ke-2019-11	K. editha	22-Jul-2019	30	66	35	–	–	–
Ke-2019-12	K. editha	29-Jun-2019	28	66	15	–	–	–
Ke-2019-13	K. editha	15-Jul-2019	29	72	40	–	–	–
Ke-2019-14	K. editha	20-Jul-2019	30	67	27	–	–	–
Ke-2019-17	K. editha	20-Jul-2019	29	76	38	–	–	–
Ke-2019-19	K. editha	20-Jul-2019	30	66	27	–	–	–
Kg-2019-01	K. gainesi	15-Jul-2019	31	82	65	91	109	7
Kg-2019-03	K. gainesi	22-Jul-2019	27	85	68	71	69	5
Kg-2019-04	K. gainesi	22-Jul-2019	29	74	73	69	74	11
Kg-2019-05	K. gainesi	20-Jul-2019	30	67	96	94	84	7
Kg-2019-06	K. gainesi	29-Jun-2019	27	68	64	92	81	2
Kg-2019-07	K. gainesi	15-Jul-2019	31	87	50	88	90	6
Kg-2019-08	K. gainesi	29-Jun-2019	27	67	68	78	63	3
Kg-2019-09	K. gainesi	22-Jul-2019	30	81	70	82	72	7
Kg-2019-10	K. gainesi	29-Jun-2019	29	64	45	76	79	1
Kg-2019-11	K. gainesi	20-Jul-2019	30	67	51	63	65	4
Kg-2019-12	K. gainesi	15-Jun-2019	31	77	55	65	109	6
Kg-2019-13	K. gainesi	15-Jul-2019	30	78	56	61	80	8
Kg-2019-15	K. gainesi	20-Jul-2019	27	85	73	75	92	7
Kg-2019-16	K. gainesi	22-Jul-2019	30	61	72	79	83	3
Kg-2019-17	K. gainesi	20-Jul-2019	30	65	42	61	65	7

## Sheet: TableA4
Table A4. The whole dataset of the field experiments in this study.
Individual ID	Snail species	Observed date	Observed time (time period)	Temperature (°C)	Humidity (%)	Distance (cm/6-hrs)	Active or not	Attached plant	Remarks
Ke-2015-01	K. editha	09-Aug-2015	06:00 (00:00–06:00, "night")	21.2	78	20	Inactive	–	–
Ke-2015-01	K. editha	09-Aug-2015	12:00 (06:00–12:00, "morning")	27.1	67	6	Inactive	–	–
Ke-2015-01	K. editha	09-Aug-2015	18:00 (12:00–18:00, "afternoon")	26.4	69	0	Inactive	–	–
Ke-2015-01	K. editha	09-Aug-2015	24:00 (18:00–24:00, "evening")	20.2	96	42	Active	–	–
Ke-2015-01	K. editha	10-Aug-2015	06:00	21.8	91	8	Inactive	–	–
Ke-2015-01	K. editha	10-Aug-2015	12:00	25.7	88	0	Inactive	–	–
Ke-2015-01	K. editha	10-Aug-2015	18:00	22.5	83	0	Inactive	–	–
Ke-2015-01	K. editha	10-Aug-2015	24:00	21.9	99	34	Active	–	–
Ke-2015-01	K. editha	11-Aug-2015	06:00	20.3	87	0	Inactive	Sanicula chinensis	–
Ke-2015-01	K. editha	11-Aug-2015	12:00	27.1	76	0	Inactive	–	–
Ke-2015-01	K. editha	11-Aug-2015	18:00	22.4	87	0	Inactive	–	–
Ke-2015-01	K. editha	11-Aug-2015	24:00	20.1	95	55	Active	–	–
Ke-2015-01	K. editha	12-Aug-2015	06:00	20.5	94	21	Inactive	Sanicula chinensis	–
Ke-2015-01	K. editha	12-Aug-2015	12:00	28.6	70	0	Inactive	Sanicula chinensis	–
Ke-2015-01	K. editha	12-Aug-2015	18:00	17.6	98	7	Active	–	Preying leaf litter
Ke-2015-01	K. editha	12-Aug-2015	24:00	16.3	90	17	Inactive	Persicaria posumbu	–
Ke-2015-01	K. editha	13-Aug-2015	06:00	17.3	93	0	Inactive	–	–
Ke-2015-01	K. editha	13-Aug-2015	12:00	24.8	80	0	Inactive	–	–
Ke-2015-01	K. editha	13-Aug-2015	18:00	26.5	66	0	Inactive	–	–
Ke-2015-01	K. editha	13-Aug-2015	24:00	19.0	83	4	Active	–	–
Ke-2015-02	K. editha	09-Aug-2015	06:00	21.2	78	0	Inactive	–	–
Ke-2015-02	K. editha	09-Aug-2015	12:00	27.1	67	0	Inactive	–	–
Ke-2015-02	K. editha	09-Aug-2015	18:00	26.4	69	0	Inactive	–	–
Ke-2015-02	K. editha	09-Aug-2015	24:00	20.2	96	42	Active	–	–
Ke-2015-02	K. editha	10-Aug-2015	06:00	21.8	91	10	Inactive	–	–
Ke-2015-02	K. editha	10-Aug-2015	12:00	25.7	88	0	Inactive	–	–
Ke-2015-02	K. editha	10-Aug-2015	18:00	22.5	83	0	Inactive	–	–
Ke-2015-02	K. editha	10-Aug-2015	24:00	21.9	99	0	Active	–	–
Ke-2015-02	K. editha	11-Aug-2015	06:00	20.3	87	0	Inactive	Sanicula chinensis	–
Ke-2015-02	K. editha	11-Aug-2015	12:00	27.1	76	0	Inactive	Sanicula chinensis	–
Ke-2015-02	K. editha	11-Aug-2015	18:00	22.4	87	0	Inactive	–	–
Ke-2015-02	K. editha	11-Aug-2015	24:00	20.1	95	24	Active	–	–
Ke-2015-02	K. editha	12-Aug-2015	06:00	20.5	94	–	–	–	Probably preyed by a siberian chipmunk, Tamias sibiricus
Ke-2015-02	K. editha	12-Aug-2015	12:00	28.6	70	–	–	–	Probably preyed by a siberian chipmunk, Tamias sibiricus
Ke-2015-02	K. editha	12-Aug-2015	18:00	17.6	98	–	–	–	Probably preyed by a siberian chipmunk, Tamias sibiricus
Ke-2015-02	K. editha	12-Aug-2015	24:00	16.3	90	–	–	–	Probably preyed by a siberian chipmunk, Tamias sibiricus
Ke-2015-02	K. editha	13-Aug-2015	06:00	17.3	93	–	–	–	Probably preyed by a siberian chipmunk, Tamias sibiricus
Ke-2015-02	K. editha	13-Aug-2015	12:00	24.8	80	–	–	–	Probably preyed by a siberian chipmunk, Tamias sibiricus
Ke-2015-02	K. editha	13-Aug-2015	18:00	26.5	66	–	–	–	Probably preyed by a siberian chipmunk, Tamias sibiricus
Ke-2015-02	K. editha	13-Aug-2015	24:00	19.0	83	–	–	–	Probably preyed by a siberian chipmunk, Tamias sibiricus
Ke-2015-03	K. editha	09-Aug-2015	06:00	21.2	78	39	Inactive	–	–
Ke-2015-03	K. editha	09-Aug-2015	12:00	27.1	67	0	Inactive	–	Sleeping with epiphragm
Ke-2015-03	K. editha	09-Aug-2015	18:00	26.4	69	0	Inactive	–	Sleeping with epiphragm
Ke-2015-03	K. editha	09-Aug-2015	24:00	20.2	96	92	Active	–	–
Ke-2015-03	K. editha	10-Aug-2015	06:00	21.8	91	17	Active	–	–
Ke-2015-03	K. editha	10-Aug-2015	12:00	25.7	88	0	Inactive	–	–
Ke-2015-03	K. editha	10-Aug-2015	18:00	22.5	83	0	Inactive	–	Sleeping with epiphragm
Ke-2015-03	K. editha	10-Aug-2015	24:00	21.9	99	26	Inactive	Artemisia montana	–
Ke-2015-03	K. editha	11-Aug-2015	06:00	20.3	87	11	Active	Artemisia montana	–
Ke-2015-03	K. editha	11-Aug-2015	12:00	27.1	76	0	Inactive	–	–
Ke-2015-03	K. editha	11-Aug-2015	18:00	22.4	87	0	Inactive	–	–
Ke-2015-03	K. editha	11-Aug-2015	24:00	20.1	95	26	Inactive	Filipendula camtschatica	–
Ke-2015-03	K. editha	12-Aug-2015	06:00	20.5	94	32	Inactive	–	–
Ke-2015-03	K. editha	12-Aug-2015	12:00	28.6	70	35	Active	–	–
Ke-2015-03	K. editha	12-Aug-2015	18:00	17.6	98	16	Active	Filipendula camtschatica	Preying a dead part of plant, Filipendula camtschatica
Ke-2015-03	K. editha	12-Aug-2015	24:00	16.3	90	17	Active	–	–
Ke-2015-03	K. editha	13-Aug-2015	06:00	17.3	93	23	Active	–	–
Ke-2015-03	K. editha	13-Aug-2015	12:00	24.8	80	30	Inactive	–	–
Ke-2015-03	K. editha	13-Aug-2015	18:00	26.5	66	7	Inactive	–	–
Ke-2015-03	K. editha	13-Aug-2015	24:00	19.0	83	35	Inactive	–	–
Ke-2015-04	K. editha	09-Aug-2015	06:00	21.2	78	41	Inactive	Filipendula camtschatica	Sleeping with epiphragm
Ke-2015-04	K. editha	09-Aug-2015	12:00	27.1	67	0	Inactive	–	Sleeping with epiphragm
Ke-2015-04	K. editha	09-Aug-2015	18:00	26.4	69	0	Inactive	–	Sleeping with epiphragm
Ke-2015-04	K. editha	09-Aug-2015	24:00	20.2	96	0	Inactive	–	Sleeping with epiphragm
Ke-2015-04	K. editha	10-Aug-2015	06:00	21.8	91	0	Inactive	–	Sleeping with epiphragm
Ke-2015-04	K. editha	10-Aug-2015	12:00	25.7	88	0	Inactive	–	Sleeping with epiphragm
Ke-2015-04	K. editha	10-Aug-2015	18:00	22.5	83	0	Inactive	Petasites japonicus subsp. giganteus	Sleeping with epiphragm
Ke-2015-04	K. editha	10-Aug-2015	24:00	21.9	99	72	Active	–	–
Ke-2015-04	K. editha	11-Aug-2015	06:00	20.3	87	0	Inactive	–	–
Ke-2015-04	K. editha	11-Aug-2015	12:00	27.1	76	0	Inactive	–	–
Ke-2015-04	K. editha	11-Aug-2015	18:00	22.4	87	0	Inactive	–	–
Ke-2015-04	K. editha	11-Aug-2015	24:00	20.1	95	147	Active	Filipendula camtschatica	–
Ke-2015-04	K. editha	12-Aug-2015	06:00	20.5	94	16	Inactive	–	–
Ke-2015-04	K. editha	12-Aug-2015	12:00	28.6	70	0	Inactive	–	–
Ke-2015-04	K. editha	12-Aug-2015	18:00	17.6	98	0	Inactive	–	–
Ke-2015-04	K. editha	12-Aug-2015	24:00	16.3	90	114	Active	Filipendula camtschatica	–
Ke-2015-04	K. editha	13-Aug-2015	06:00	17.3	93	0	Inactive	–	–
Ke-2015-04	K. editha	13-Aug-2015	12:00	24.8	80	0	Inactive	–	–
Ke-2015-04	K. editha	13-Aug-2015	18:00	26.5	66	0	Inactive	–	–
Ke-2015-04	K. editha	13-Aug-2015	24:00	19.0	83	68	Active	Filipendula camtschatica	–
Ke-2015-05	K. editha	09-Aug-2015	06:00	21.2	78	25	Inactive	–	–
Ke-2015-05	K. editha	09-Aug-2015	12:00	27.1	67	0	Inactive	–	–
Ke-2015-05	K. editha	09-Aug-2015	18:00	26.4	69	0	Inactive	–	–
Ke-2015-05	K. editha	09-Aug-2015	24:00	20.2	96	112	Active	–	–
Ke-2015-05	K. editha	10-Aug-2015	06:00	21.8	91	0	Inactive	–	–
Ke-2015-05	K. editha	10-Aug-2015	12:00	25.7	88	0	Inactive	–	–
Ke-2015-05	K. editha	10-Aug-2015	18:00	22.5	83	0	Inactive	–	Sleeping with epiphragm
Ke-2015-05	K. editha	10-Aug-2015	24:00	21.9	99	0	Inactive	–	Sleeping with epiphragm
Ke-2015-05	K. editha	11-Aug-2015	06:00	20.3	87	0	Inactive	–	Sleeping with epiphragm
Ke-2015-05	K. editha	11-Aug-2015	12:00	27.1	76	0	Inactive	–	Sleeping with epiphragm
Ke-2015-05	K. editha	11-Aug-2015	18:00	22.4	87	0	Inactive	–	–
Ke-2015-05	K. editha	11-Aug-2015	24:00	20.1	95	139	Active	–	–
Ke-2015-05	K. editha	12-Aug-2015	06:00	20.5	94	15	Active	–	–
Ke-2015-05	K. editha	12-Aug-2015	12:00	28.6	70	23	Inactive	Petasites japonicus subsp. giganteus	–
Ke-2015-05	K. editha	12-Aug-2015	18:00	17.6	98	17	Active	Petasites japonicus subsp. giganteus	–
Ke-2015-05	K. editha	12-Aug-2015	24:00	16.3	90	71	Active	–	Preying leaf litter
Ke-2015-05	K. editha	13-Aug-2015	06:00	17.3	93	6	Inactive	–	–
Ke-2015-05	K. editha	13-Aug-2015	12:00	24.8	80	16	Inactive	–	–
Ke-2015-05	K. editha	13-Aug-2015	18:00	26.5	66	22	Inactive	–	–
Ke-2015-05	K. editha	13-Aug-2015	24:00	19.0	83	86	Active	–	–
Ke-2015-06	K. editha	09-Aug-2015	06:00	21.2	78	18	Inactive	–	Sleeping with epiphragm
Ke-2015-06	K. editha	09-Aug-2015	12:00	27.1	67	0	Inactive	–	Sleeping with epiphragm
Ke-2015-06	K. editha	09-Aug-2015	18:00	26.4	69	0	Inactive	–	Sleeping with epiphragm
Ke-2015-06	K. editha	09-Aug-2015	24:00	20.2	96	59	Active	Athyrium sp.	–
Ke-2015-06	K. editha	10-Aug-2015	06:00	21.8	91	0	Inactive	–	–
Ke-2015-06	K. editha	10-Aug-2015	12:00	25.7	88	0	Inactive	–	–
Ke-2015-06	K. editha	10-Aug-2015	18:00	22.5	83	0	Active	–	–
Ke-2015-06	K. editha	10-Aug-2015	24:00	21.9	99	109	Active	–	–
Ke-2015-06	K. editha	11-Aug-2015	06:00	20.3	87	61	Inactive	–	–
Ke-2015-06	K. editha	11-Aug-2015	12:00	27.1	76	0	Inactive	–	–
Ke-2015-06	K. editha	11-Aug-2015	18:00	22.4	87	0	Active	–	–
Ke-2015-06	K. editha	11-Aug-2015	24:00	20.1	95	67	Active	Filipendula camtschatica	–
Ke-2015-06	K. editha	12-Aug-2015	06:00	20.5	94	43	Active	Filipendula camtschatica	–
Ke-2015-06	K. editha	12-Aug-2015	12:00	28.6	70	0	Inactive	–	–
Ke-2015-06	K. editha	12-Aug-2015	18:00	17.6	98	24	Active	Petasites japonicus subsp. giganteus	–
Ke-2015-06	K. editha	12-Aug-2015	24:00	16.3	90	91	Active	–	–
Ke-2015-06	K. editha	13-Aug-2015	06:00	17.3	93	61	Active	–	–
Ke-2015-06	K. editha	13-Aug-2015	12:00	24.8	80	32	Inactive	Filipendula camtschatica	–
Ke-2015-06	K. editha	13-Aug-2015	18:00	26.5	66	0	Inactive	–	–
Ke-2015-06	K. editha	13-Aug-2015	24:00	19.0	83	12	Active	–	–
Ke-2015-07	K. editha	09-Aug-2015	06:00	21.2	78	0	Inactive	–	Sleeping with epiphragm
Ke-2015-07	K. editha	09-Aug-2015	12:00	27.1	67	0	Inactive	–	Sleeping with epiphragm
Ke-2015-07	K. editha	09-Aug-2015	18:00	26.4	69	0	Inactive	–	Sleeping with epiphragm
Ke-2015-07	K. editha	09-Aug-2015	24:00	20.2	96	22	Active	Urtica platyphylla	–
Ke-2015-07	K. editha	10-Aug-2015	06:00	21.8	91	110	Inactive	Angelica ursina	Sleeping with epiphragm
Ke-2015-07	K. editha	10-Aug-2015	12:00	25.7	88	0	Inactive	–	Sleeping with epiphragm
Ke-2015-07	K. editha	10-Aug-2015	18:00	22.5	83	0	Inactive	–	Sleeping with epiphragm
Ke-2015-07	K. editha	10-Aug-2015	24:00	21.9	99	17	Active	–	–
Ke-2015-07	K. editha	11-Aug-2015	06:00	20.3	87	34	Inactive	Angelica ursina	Sleeping with epiphragm
Ke-2015-07	K. editha	11-Aug-2015	12:00	27.1	76	0	Inactive	–	Sleeping with epiphragm
Ke-2015-07	K. editha	11-Aug-2015	18:00	22.4	87	29	Active	Chelonopsis moschata	–
Ke-2015-07	K. editha	11-Aug-2015	24:00	20.1	95	11	Active	Chelonopsis moschata	–
Ke-2015-07	K. editha	12-Aug-2015	06:00	20.5	94	11	Inactive	Sanicula chinensis	–
Ke-2015-07	K. editha	12-Aug-2015	12:00	28.6	70	0	Inactive	–	–
Ke-2015-07	K. editha	12-Aug-2015	18:00	17.6	98	87	Active	Angelica ursina	–
Ke-2015-07	K. editha	12-Aug-2015	24:00	16.3	90	28	Active	–	–
Ke-2015-07	K. editha	13-Aug-2015	06:00	17.3	93	88	Active	Angelica ursina	–
Ke-2015-07	K. editha	13-Aug-2015	12:00	24.8	80	19	Inactive	–	–
Ke-2015-07	K. editha	13-Aug-2015	18:00	26.5	66	0	Active	–	–
Ke-2015-07	K. editha	13-Aug-2015	24:00	19.0	83	268	Active	Cyperaceae gen. sp.	–
Ke-2015-08	K. editha	09-Aug-2015	06:00	21.2	78	10	Inactive	–	–
Ke-2015-08	K. editha	09-Aug-2015	12:00	27.1	67	0	Inactive	–	–
Ke-2015-08	K. editha	09-Aug-2015	18:00	26.4	69	0	Inactive	–	–
Ke-2015-08	K. editha	09-Aug-2015	24:00	20.2	96	48	Active	–	–
Ke-2015-08	K. editha	10-Aug-2015	06:00	21.8	91	13	Active	Persicaria posumbu	–
Ke-2015-08	K. editha	10-Aug-2015	12:00	25.7	88	0	Inactive	–	–
Ke-2015-08	K. editha	10-Aug-2015	18:00	22.5	83	0	Inactive	–	–
Ke-2015-08	K. editha	10-Aug-2015	24:00	21.9	99	53	Active	–	–
Ke-2015-08	K. editha	11-Aug-2015	06:00	20.3	87	92	Active	Filipendula camtschatica	Probably preying a living plant, Filipendula camtschatica
Ke-2015-08	K. editha	11-Aug-2015	12:00	27.1	76	23	Inactive	–	–
Ke-2015-08	K. editha	11-Aug-2015	18:00	22.4	87	74	Active	Persicaria posumbu	–
Ke-2015-08	K. editha	11-Aug-2015	24:00	20.1	95	21	Active	–	–
Ke-2015-08	K. editha	12-Aug-2015	06:00	20.5	94	24	Active	–	–
Ke-2015-08	K. editha	12-Aug-2015	12:00	28.6	70	0	Inactive	–	–
Ke-2015-08	K. editha	12-Aug-2015	18:00	17.6	98	14	Active	Persicaria posumbu	–
Ke-2015-08	K. editha	12-Aug-2015	24:00	16.3	90	23	Active	Aruncus dioicus var. kamtschaticus	–
Ke-2015-08	K. editha	13-Aug-2015	06:00	17.3	93	0	Inactive	–	–
Ke-2015-08	K. editha	13-Aug-2015	12:00	24.8	80	0	Inactive	Sanicula chinensis	–
Ke-2015-08	K. editha	13-Aug-2015	18:00	26.5	66	0	Inactive	Sanicula chinensis	–
Ke-2015-08	K. editha	13-Aug-2015	24:00	19.0	83	0	Active	–	–
Ke-2015-09	K. editha	09-Aug-2015	06:00	21.2	78	35	Inactive	–	–
Ke-2015-09	K. editha	09-Aug-2015	12:00	27.1	67	0	Inactive	–	–
Ke-2015-09	K. editha	09-Aug-2015	18:00	26.4	69	0	Inactive	–	–
Ke-2015-09	K. editha	09-Aug-2015	24:00	20.2	96	54	Active	Filipendula camtschatica	–
Ke-2015-09	K. editha	10-Aug-2015	06:00	21.8	91	49	Inactive	–	–
Ke-2015-09	K. editha	10-Aug-2015	12:00	25.7	88	0	Inactive	–	–
Ke-2015-09	K. editha	10-Aug-2015	18:00	22.5	83	0	Inactive	–	–
Ke-2015-09	K. editha	10-Aug-2015	24:00	21.9	99	51	Active	–	–
Ke-2015-09	K. editha	11-Aug-2015	06:00	20.3	87	95	Inactive	Filipendula camtschatica	–
Ke-2015-09	K. editha	11-Aug-2015	12:00	27.1	76	18	Inactive	–	–
Ke-2015-09	K. editha	11-Aug-2015	18:00	22.4	87	20	Active	Filipendula camtschatica	–
Ke-2015-09	K. editha	11-Aug-2015	24:00	20.1	95	74	Active	–	–
Ke-2015-09	K. editha	12-Aug-2015	06:00	20.5	94	68	Inactive	–	–
Ke-2015-09	K. editha	12-Aug-2015	12:00	28.6	70	59	Inactive	–	–
Ke-2015-09	K. editha	12-Aug-2015	18:00	17.6	98	73	Active	Filipendula camtschatica	–
Ke-2015-09	K. editha	12-Aug-2015	24:00	16.3	90	68	Active	Filipendula camtschatica	–
Ke-2015-09	K. editha	13-Aug-2015	06:00	17.3	93	38	Inactive	–	–
Ke-2015-09	K. editha	13-Aug-2015	12:00	24.8	80	3	Inactive	–	–
Ke-2015-09	K. editha	13-Aug-2015	18:00	26.5	66	0	Inactive	–	–
Ke-2015-09	K. editha	13-Aug-2015	24:00	19.0	83	143	Inactive	Filipendula camtschatica	Sleeping with epiphragm
Ke-2015-10	K. editha	09-Aug-2015	06:00	21.2	78	6	Inactive	–	Sleeping with epiphragm
Ke-2015-10	K. editha	09-Aug-2015	12:00	27.1	67	0	Inactive	–	Sleeping with epiphragm
Ke-2015-10	K. editha	09-Aug-2015	18:00	26.4	69	0	Inactive	–	Sleeping with epiphragm
Ke-2015-10	K. editha	09-Aug-2015	24:00	20.2	96	52	Inactive	–	–
Ke-2015-10	K. editha	10-Aug-2015	06:00	21.8	91	5	Inactive	–	–
Ke-2015-10	K. editha	10-Aug-2015	12:00	25.7	88	0	Inactive	–	–
Ke-2015-10	K. editha	10-Aug-2015	18:00	22.5	83	0	Inactive	–	–
Ke-2015-10	K. editha	10-Aug-2015	24:00	21.9	99	26	Active	–	–
Ke-2015-10	K. editha	11-Aug-2015	06:00	20.3	87	0	Inactive	–	–
Ke-2015-10	K. editha	11-Aug-2015	12:00	27.1	76	0	Inactive	–	–
Ke-2015-10	K. editha	11-Aug-2015	18:00	22.4	87	0	Inactive	–	–
Ke-2015-10	K. editha	11-Aug-2015	24:00	20.1	95	166	Active	Filipendula camtschatica	–
Ke-2015-10	K. editha	12-Aug-2015	06:00	20.5	94	0	Inactive	–	Sleeping with epiphragm
Ke-2015-10	K. editha	12-Aug-2015	12:00	28.6	70	0	Inactive	–	Sleeping with epiphragm
Ke-2015-10	K. editha	12-Aug-2015	18:00	17.6	98	0	Active	–	–
Ke-2015-10	K. editha	12-Aug-2015	24:00	16.3	90	85	Active	Filipendula camtschatica	–
Ke-2015-10	K. editha	13-Aug-2015	06:00	17.3	93	0	Inactive	–	–
Ke-2015-10	K. editha	13-Aug-2015	12:00	24.8	80	0	Inactive	–	–
Ke-2015-10	K. editha	13-Aug-2015	18:00	26.5	66	0	Inactive	–	–
Ke-2015-10	K. editha	13-Aug-2015	24:00	19.0	83	78	Inactive	–	–
Kg-2015-01	K. gainesi	09-Aug-2015	06:00	21.2	78	53	Inactive	–	–
Kg-2015-01	K. gainesi	09-Aug-2015	12:00	27.1	67	12	Inactive	–	–
Kg-2015-01	K. gainesi	09-Aug-2015	18:00	26.4	69	39	Inactive	–	–
Kg-2015-01	K. gainesi	09-Aug-2015	24:00	20.2	96	106	Inactive	Petasites japonicus subsp. giganteus	–
Kg-2015-01	K. gainesi	10-Aug-2015	06:00	21.8	91	76	Active	–	–
Kg-2015-01	K. gainesi	10-Aug-2015	12:00	25.7	88	88	Inactive	–	–
Kg-2015-01	K. gainesi	10-Aug-2015	18:00	22.5	83	77	Active	–	–
Kg-2015-01	K. gainesi	10-Aug-2015	24:00	21.9	99	111	Inactive	Petasites japonicus subsp. giganteus	–
Kg-2015-01	K. gainesi	11-Aug-2015	06:00	20.3	87	158	Active	Petasites japonicus subsp. giganteus	–
Kg-2015-01	K. gainesi	11-Aug-2015	12:00	27.1	76	67	Active	–	–
Kg-2015-01	K. gainesi	11-Aug-2015	18:00	22.4	87	63	Active	Petasites japonicus subsp. giganteus	–
Kg-2015-01	K. gainesi	11-Aug-2015	24:00	20.1	95	146	Active	Petasites japonicus subsp. giganteus	–
Kg-2015-01	K. gainesi	12-Aug-2015	06:00	20.5	94	37	Active	–	Preying leaf litter
Kg-2015-01	K. gainesi	12-Aug-2015	12:00	28.6	70	113	Inactive	Petasites japonicus subsp. giganteus	–
Kg-2015-01	K. gainesi	12-Aug-2015	18:00	17.6	98	99	Active	Petasites japonicus subsp. giganteus	–
Kg-2015-01	K. gainesi	12-Aug-2015	24:00	16.3	90	92	Active	–	Preying a dead part of plant, Petasites japonicus subsp. giganteus
Kg-2015-01	K. gainesi	13-Aug-2015	06:00	17.3	93	108	Active	–	Preying leaf litter
Kg-2015-01	K. gainesi	13-Aug-2015	12:00	24.8	80	114	Active	–	Preying leaf litter
Kg-2015-01	K. gainesi	13-Aug-2015	18:00	26.5	66	144	Active	–	–
Kg-2015-01	K. gainesi	13-Aug-2015	24:00	19.0	83	82	Active	Petasites japonicus subsp. giganteus	–
Kg-2015-02	K. gainesi	09-Aug-2015	06:00	21.2	78	102	Active	–	–
Kg-2015-02	K. gainesi	09-Aug-2015	12:00	27.1	67	0	Inactive	–	–
Kg-2015-02	K. gainesi	09-Aug-2015	18:00	26.4	69	0	Inactive	–	–
Kg-2015-02	K. gainesi	09-Aug-2015	24:00	20.2	96	189	Active	Petasites japonicus subsp. giganteus	–
Kg-2015-02	K. gainesi	10-Aug-2015	06:00	21.8	91	93	Active	–	–
Kg-2015-02	K. gainesi	10-Aug-2015	12:00	25.7	88	104	Active	–	–
Kg-2015-02	K. gainesi	10-Aug-2015	18:00	22.5	83	215	Active	–	Preying leaf litter
Kg-2015-02	K. gainesi	10-Aug-2015	24:00	21.9	99	94	Active	–	–
Kg-2015-02	K. gainesi	11-Aug-2015	06:00	20.3	87	23	Active	Filipendula camtschatica	–
Kg-2015-02	K. gainesi	11-Aug-2015	12:00	27.1	76	13	Inactive	–	–
Kg-2015-02	K. gainesi	11-Aug-2015	18:00	22.4	87	199	Active	–	Preying leaf litter
Kg-2015-02	K. gainesi	11-Aug-2015	24:00	20.1	95	110	Active	–	–
Kg-2015-02	K. gainesi	12-Aug-2015	06:00	20.5	94	115	Active	–	Preying leaf litter
Kg-2015-02	K. gainesi	12-Aug-2015	12:00	28.6	70	83	Active	Sanicula chinensis	Probably preying a living plant, Sanicula chinensis
Kg-2015-02	K. gainesi	12-Aug-2015	18:00	17.6	98	93	Active	–	–
Kg-2015-02	K. gainesi	12-Aug-2015	24:00	16.3	90	5	Inactive	–	–
Kg-2015-02	K. gainesi	13-Aug-2015	06:00	17.3	93	11	Active	–	Preying leaf litter
Kg-2015-02	K. gainesi	13-Aug-2015	12:00	24.8	80	48	Active	–	Preying leaf litter
Kg-2015-02	K. gainesi	13-Aug-2015	18:00	26.5	66	44	Active	–	–
Kg-2015-02	K. gainesi	13-Aug-2015	24:00	19.0	83	100	Active	–	–
Kg-2015-03	K. gainesi	09-Aug-2015	06:00	21.2	78	37	Active	Petasites japonicus subsp. giganteus	–
Kg-2015-03	K. gainesi	09-Aug-2015	12:00	27.1	67	10	Inactive	–	–
Kg-2015-03	K. gainesi	09-Aug-2015	18:00	26.4	69	129	Inactive	Petasites japonicus subsp. giganteus	–
Kg-2015-03	K. gainesi	09-Aug-2015	24:00	20.2	96	162	Active	Petasites japonicus subsp. giganteus	–
Kg-2015-03	K. gainesi	10-Aug-2015	06:00	21.8	91	127	Inactive	Petasites japonicus subsp. giganteus	–
Kg-2015-03	K. gainesi	10-Aug-2015	12:00	25.7	88	94	Inactive	Petasites japonicus subsp. giganteus	–
Kg-2015-03	K. gainesi	10-Aug-2015	18:00	22.5	83	146	Inactive	Petasites japonicus subsp. giganteus	–
Kg-2015-03	K. gainesi	10-Aug-2015	24:00	21.9	99	170	Active	Petasites japonicus subsp. giganteus	–
Kg-2015-03	K. gainesi	11-Aug-2015	06:00	20.3	87	148	Active	Petasites japonicus subsp. giganteus	–
Kg-2015-03	K. gainesi	11-Aug-2015	12:00	27.1	76	206	Inactive	Petasites japonicus subsp. giganteus	–
Kg-2015-03	K. gainesi	11-Aug-2015	18:00	22.4	87	127	Inactive	Petasites japonicus subsp. giganteus	–
Kg-2015-03	K. gainesi	11-Aug-2015	24:00	20.1	95	160	Active	Petasites japonicus subsp. giganteus	–
Kg-2015-03	K. gainesi	12-Aug-2015	06:00	20.5	94	59	Active	–	Preying leaf litter
Kg-2015-03	K. gainesi	12-Aug-2015	12:00	28.6	70	77	Inactive	Petasites japonicus subsp. giganteus	–
Kg-2015-03	K. gainesi	12-Aug-2015	18:00	17.6	98	82	Active	Petasites japonicus subsp. giganteus	–
Kg-2015-03	K. gainesi	12-Aug-2015	24:00	16.3	90	96	Active	Petasites japonicus subsp. giganteus	–
Kg-2015-03	K. gainesi	13-Aug-2015	06:00	17.3	93	111	Inactive	Petasites japonicus subsp. giganteus	–
Kg-2015-03	K. gainesi	13-Aug-2015	12:00	24.8	80	51	Active	Senecio cannabifolius	Preying a dead part of plant, Senecio cannabifolius
Kg-2015-03	K. gainesi	13-Aug-2015	18:00	26.5	66	78	Active	Filipendula camtschatica	–
Kg-2015-03	K. gainesi	13-Aug-2015	24:00	19.0	83	82	Active	Petasites japonicus subsp. giganteus	–
Kg-2015-04	K. gainesi	09-Aug-2015	06:00	21.2	78	40	Inactive	–	–
Kg-2015-04	K. gainesi	09-Aug-2015	12:00	27.1	67	13	Inactive	–	–
Kg-2015-04	K. gainesi	09-Aug-2015	18:00	26.4	69	90	Inactive	–	–
Kg-2015-04	K. gainesi	09-Aug-2015	24:00	20.2	96	65	Active	–	–
Kg-2015-04	K. gainesi	10-Aug-2015	06:00	21.8	91	216	Inactive	Petasites japonicus subsp. giganteus	–
Kg-2015-04	K. gainesi	10-Aug-2015	12:00	25.7	88	56	Inactive	–	–
Kg-2015-04	K. gainesi	10-Aug-2015	18:00	22.5	83	42	Active	–	–
Kg-2015-04	K. gainesi	10-Aug-2015	24:00	21.9	99	87	Active	Petasites japonicus subsp. giganteus	–
Kg-2015-04	K. gainesi	11-Aug-2015	06:00	20.3	87	120	Active	Petasites japonicus subsp. giganteus	Preying a dead part of plant, Petasites japonicus subsp. giganteus
Kg-2015-04	K. gainesi	11-Aug-2015	12:00	27.1	76	71	Inactive	Petasites japonicus subsp. giganteus	–
Kg-2015-04	K. gainesi	11-Aug-2015	18:00	22.4	87	127	Active	–	–
Kg-2015-04	K. gainesi	11-Aug-2015	24:00	20.1	95	123	Active	Petasites japonicus subsp. giganteus	–
Kg-2015-04	K. gainesi	12-Aug-2015	06:00	20.5	94	91	Active	–	–
Kg-2015-04	K. gainesi	12-Aug-2015	12:00	28.6	70	116	Inactive	–	–
Kg-2015-04	K. gainesi	12-Aug-2015	18:00	17.6	98	155	Active	–	–
Kg-2015-04	K. gainesi	12-Aug-2015	24:00	16.3	90	58	Active	Petasites japonicus subsp. giganteus	Probably preying a living plant, Petasites japonicus subsp. giganteus
Kg-2015-04	K. gainesi	13-Aug-2015	06:00	17.3	93	110	Active	Petasites japonicus subsp. giganteus	–
Kg-2015-04	K. gainesi	13-Aug-2015	12:00	24.8	80	62	Active	Petasites japonicus subsp. giganteus	–
Kg-2015-04	K. gainesi	13-Aug-2015	18:00	26.5	66	80	Active	–	–
Kg-2015-04	K. gainesi	13-Aug-2015	24:00	19.0	83	78	Active	Petasites japonicus subsp. giganteus	–
Kg-2015-05	K. gainesi	09-Aug-2015	06:00	21.2	78	68	Active	–	–
Kg-2015-05	K. gainesi	09-Aug-2015	12:00	27.1	67	7	Inactive	–	–
Kg-2015-05	K. gainesi	09-Aug-2015	18:00	26.4	69	0	Inactive	–	–
Kg-2015-05	K. gainesi	09-Aug-2015	24:00	20.2	96	13	Inactive	–	–
Kg-2015-05	K. gainesi	10-Aug-2015	06:00	21.8	91	93	Inactive	–	–
Kg-2015-05	K. gainesi	10-Aug-2015	12:00	25.7	88	0	Inactive	–	–
Kg-2015-05	K. gainesi	10-Aug-2015	18:00	22.5	83	14	Active	–	–
Kg-2015-05	K. gainesi	10-Aug-2015	24:00	21.9	99	159	Active	–	–
Kg-2015-05	K. gainesi	11-Aug-2015	06:00	20.3	87	-	-	–	Probably preyed by a siberian chipmunk, Tamias sibiricus
Kg-2015-05	K. gainesi	11-Aug-2015	12:00	27.1	76	-	-	–	Probably preyed by a siberian chipmunk, Tamias sibiricus
Kg-2015-05	K. gainesi	11-Aug-2015	18:00	22.4	87	-	-	–	Probably preyed by a siberian chipmunk, Tamias sibiricus
Kg-2015-05	K. gainesi	11-Aug-2015	24:00	20.1	95	-	-	–	Probably preyed by a siberian chipmunk, Tamias sibiricus
Kg-2015-05	K. gainesi	12-Aug-2015	06:00	20.5	94	-	-	–	Probably preyed by a siberian chipmunk, Tamias sibiricus
Kg-2015-05	K. gainesi	12-Aug-2015	12:00	28.6	70	-	-	–	Probably preyed by a siberian chipmunk, Tamias sibiricus
Kg-2015-05	K. gainesi	12-Aug-2015	18:00	17.6	98	-	-	–	Probably preyed by a siberian chipmunk, Tamias sibiricus
Kg-2015-05	K. gainesi	12-Aug-2015	24:00	16.3	90	-	-	–	Probably preyed by a siberian chipmunk, Tamias sibiricus
Kg-2015-05	K. gainesi	13-Aug-2015	06:00	17.3	93	-	-	–	Probably preyed by a siberian chipmunk, Tamias sibiricus
Kg-2015-05	K. gainesi	13-Aug-2015	12:00	24.8	80	-	-	–	Probably preyed by a siberian chipmunk, Tamias sibiricus
Kg-2015-05	K. gainesi	13-Aug-2015	18:00	26.5	66	-	-	–	Probably preyed by a siberian chipmunk, Tamias sibiricus
Kg-2015-05	K. gainesi	13-Aug-2015	24:00	19.0	83	-	-	–	Probably preyed by a siberian chipmunk, Tamias sibiricus
Kg-2015-06	K. gainesi	09-Aug-2015	06:00	21.2	78	26	Inactive	–	–
Kg-2015-06	K. gainesi	09-Aug-2015	12:00	27.1	67	183	Inactive	–	–
Kg-2015-06	K. gainesi	09-Aug-2015	18:00	26.4	69	216	Inactive	Chelonopsis moschata	–
Kg-2015-06	K. gainesi	09-Aug-2015	24:00	20.2	96	170	Inactive	Filipendula camtschatica	–
Kg-2015-06	K. gainesi	10-Aug-2015	06:00	21.8	91	90	Inactive	–	–
Kg-2015-06	K. gainesi	10-Aug-2015	12:00	25.7	88	0	Inactive	–	–
Kg-2015-06	K. gainesi	10-Aug-2015	18:00	22.5	83	34	Active	–	–
Kg-2015-06	K. gainesi	10-Aug-2015	24:00	21.9	99	75	Active	Petasites japonicus subsp. giganteus	–
Kg-2015-06	K. gainesi	11-Aug-2015	06:00	20.3	87	64	Active	Filipendula camtschatica	–
Kg-2015-06	K. gainesi	11-Aug-2015	12:00	27.1	76	155	Active	Angelica ursina	–
Kg-2015-06	K. gainesi	11-Aug-2015	18:00	22.4	87	114	Inactive	Petasites japonicus subsp. giganteus	–
Kg-2015-06	K. gainesi	11-Aug-2015	24:00	20.1	95	153	Active	Chelonopsis moschata	–
Kg-2015-06	K. gainesi	12-Aug-2015	06:00	20.5	94	115	Active	Petasites japonicus subsp. giganteus	–
Kg-2015-06	K. gainesi	12-Aug-2015	12:00	28.6	70	121	Inactive	Filipendula camtschatica	–
Kg-2015-06	K. gainesi	12-Aug-2015	18:00	17.6	98	204	Active	Filipendula camtschatica	Probably preying a living plant, Filipendula camtschatica
Kg-2015-06	K. gainesi	12-Aug-2015	24:00	16.3	90	102	Active	Petasites japonicus subsp. giganteus	–
Kg-2015-06	K. gainesi	13-Aug-2015	06:00	17.3	93	60	Active	–	–
Kg-2015-06	K. gainesi	13-Aug-2015	12:00	24.8	80	60	Inactive	Filipendula camtschatica	–
Kg-2015-06	K. gainesi	13-Aug-2015	18:00	26.5	66	290	Inactive	Toxicodendron orientale	–
Kg-2015-06	K. gainesi	13-Aug-2015	24:00	19.0	83	65	Inactive	Filipendula camtschatica	–
Kg-2015-07	K. gainesi	09-Aug-2015	06:00	21.2	78	46	Active	–	–
Kg-2015-07	K. gainesi	09-Aug-2015	12:00	27.1	67	110	Active	–	–
Kg-2015-07	K. gainesi	09-Aug-2015	18:00	26.4	69	80	Active	–	–
Kg-2015-07	K. gainesi	09-Aug-2015	24:00	20.2	96	33	Active	Petasites japonicus subsp. giganteus	–
Kg-2015-07	K. gainesi	10-Aug-2015	06:00	21.8	91	151	Active	–	–
Kg-2015-07	K. gainesi	10-Aug-2015	12:00	25.7	88	25	Active	Petasites japonicus subsp. giganteus	Preying a dead part of plant, Petasites japonicus subsp. giganteus
Kg-2015-07	K. gainesi	10-Aug-2015	18:00	22.5	83	129	Active	Petasites japonicus subsp. giganteus	–
Kg-2015-07	K. gainesi	10-Aug-2015	24:00	21.9	99	133	Active	Petasites japonicus subsp. giganteus	–
Kg-2015-07	K. gainesi	11-Aug-2015	06:00	20.3	87	69	Inactive	Petasites japonicus subsp. giganteus	–
Kg-2015-07	K. gainesi	11-Aug-2015	12:00	27.1	76	56	Inactive	Petasites japonicus subsp. giganteus	–
Kg-2015-07	K. gainesi	11-Aug-2015	18:00	22.4	87	140	Active	Angelica ursina	–
Kg-2015-07	K. gainesi	11-Aug-2015	24:00	20.1	95	125	Active	–	–
Kg-2015-07	K. gainesi	12-Aug-2015	06:00	20.5	94	58	Inactive	–	–
Kg-2015-07	K. gainesi	12-Aug-2015	12:00	28.6	70	22	Active	–	–
Kg-2015-07	K. gainesi	12-Aug-2015	18:00	17.6	98	65	Active	Petasites japonicus subsp. giganteus	–
Kg-2015-07	K. gainesi	12-Aug-2015	24:00	16.3	90	65	Active	Petasites japonicus subsp. giganteus	–
Kg-2015-07	K. gainesi	13-Aug-2015	06:00	17.3	93	141	Inactive	Petasites japonicus subsp. giganteus	–
Kg-2015-07	K. gainesi	13-Aug-2015	12:00	24.8	80	27	Active	Petasites japonicus subsp. giganteus	Preying a dead part of plant, Petasites japonicus subsp. giganteus
Kg-2015-07	K. gainesi	13-Aug-2015	18:00	26.5	66	70	Active	Petasites japonicus subsp. giganteus	–
Kg-2015-07	K. gainesi	13-Aug-2015	24:00	19.0	83	96	Active	–	–
Kg-2015-08	K. gainesi	09-Aug-2015	06:00	21.2	78	24	Active	–	–
Kg-2015-08	K. gainesi	09-Aug-2015	12:00	27.1	67	43	Active	–	–
Kg-2015-08	K. gainesi	09-Aug-2015	18:00	26.4	69	27	Inactive	–	–
Kg-2015-08	K. gainesi	09-Aug-2015	24:00	20.2	96	43	Active	Filipendula camtschatica	–
Kg-2015-08	K. gainesi	10-Aug-2015	06:00	21.8	91	22	Inactive	–	–
Kg-2015-08	K. gainesi	10-Aug-2015	12:00	25.7	88	0	Inactive	–	–
Kg-2015-08	K. gainesi	10-Aug-2015	18:00	22.5	83	38	Active	–	–
Kg-2015-08	K. gainesi	10-Aug-2015	24:00	21.9	99	145	Active	Filipendula camtschatica	–
Kg-2015-08	K. gainesi	11-Aug-2015	06:00	20.3	87	67	Active	–	–
Kg-2015-08	K. gainesi	11-Aug-2015	12:00	27.1	76	61	Active	–	–
Kg-2015-08	K. gainesi	11-Aug-2015	18:00	22.4	87	70	Active	–	–
Kg-2015-08	K. gainesi	11-Aug-2015	24:00	20.1	95	121	Active	Artemisia montana	–
Kg-2015-08	K. gainesi	12-Aug-2015	06:00	20.5	94	0	Inactive	–	–
Kg-2015-08	K. gainesi	12-Aug-2015	12:00	28.6	70	124	Active	–	Preying leaf litter
Kg-2015-08	K. gainesi	12-Aug-2015	18:00	17.6	98	-	-	–	Dead anyway
Kg-2015-08	K. gainesi	12-Aug-2015	24:00	16.3	90	-	-	–	Dead anyway
Kg-2015-08	K. gainesi	13-Aug-2015	06:00	17.3	93	-	-	–	Dead anyway
Kg-2015-08	K. gainesi	13-Aug-2015	12:00	24.8	80	-	-	–	Dead anyway
Kg-2015-08	K. gainesi	13-Aug-2015	18:00	26.5	66	-	-	–	Dead anyway
Kg-2015-08	K. gainesi	13-Aug-2015	24:00	19.0	83	-	-	–	Dead anyway
Kg-2015-09	K. gainesi	09-Aug-2015	06:00	21.2	78	42	Active	–	–
Kg-2015-09	K. gainesi	09-Aug-2015	12:00	27.1	67	8	Inactive	–	–
Kg-2015-09	K. gainesi	09-Aug-2015	18:00	26.4	69	57	Inactive	Filipendula camtschatica	–
Kg-2015-09	K. gainesi	09-Aug-2015	24:00	20.2	96	96	Inactive	Filipendula camtschatica	–
Kg-2015-09	K. gainesi	10-Aug-2015	06:00	21.8	91	23	Inactive	–	–
Kg-2015-09	K. gainesi	10-Aug-2015	12:00	25.7	88	35	Inactive	–	–
Kg-2015-09	K. gainesi	10-Aug-2015	18:00	22.5	83	90	Inactive	–	–
Kg-2015-09	K. gainesi	10-Aug-2015	24:00	21.9	99	107	Inactive	–	–
Kg-2015-09	K. gainesi	11-Aug-2015	06:00	20.3	87	38	Active	–	–
Kg-2015-09	K. gainesi	11-Aug-2015	12:00	27.1	76	77	Inactive	Filipendula camtschatica	–
Kg-2015-09	K. gainesi	11-Aug-2015	18:00	22.4	87	51	Inactive	Filipendula camtschatica	–
Kg-2015-09	K. gainesi	11-Aug-2015	24:00	20.1	95	65	Active	Filipendula camtschatica	–
Kg-2015-09	K. gainesi	12-Aug-2015	06:00	20.5	94	285	Active	Filipendula camtschatica	–
Kg-2015-09	K. gainesi	12-Aug-2015	12:00	28.6	70	246	Active	–	–
Kg-2015-09	K. gainesi	12-Aug-2015	18:00	17.6	98	203	Inactive	Filipendula camtschatica	–
Kg-2015-09	K. gainesi	12-Aug-2015	24:00	16.3	90	139	Inactive	Filipendula camtschatica	–
Kg-2015-09	K. gainesi	13-Aug-2015	06:00	17.3	93	122	Inactive	Filipendula camtschatica	–
Kg-2015-09	K. gainesi	13-Aug-2015	12:00	24.8	80	264	Inactive	Filipendula camtschatica	–
Kg-2015-09	K. gainesi	13-Aug-2015	18:00	26.5	66	165	Active	Filipendula camtschatica	–
Kg-2015-09	K. gainesi	13-Aug-2015	24:00	19.0	83	180	Inactive	Filipendula camtschatica	–
Kg-2015-10	K. gainesi	09-Aug-2015	06:00	21.2	78	55	Inactive	Filipendula camtschatica	–
Kg-2015-10	K. gainesi	09-Aug-2015	12:00	27.1	67	69	Inactive	–	–
Kg-2015-10	K. gainesi	09-Aug-2015	18:00	26.4	69	19	Inactive	–	–
Kg-2015-10	K. gainesi	09-Aug-2015	24:00	20.2	96	76	Active	Urtica platyphylla	–
Kg-2015-10	K. gainesi	10-Aug-2015	06:00	21.8	91	102	Active	Filipendula camtschatica	–
Kg-2015-10	K. gainesi	10-Aug-2015	12:00	25.7	88	46	Inactive	–	–
Kg-2015-10	K. gainesi	10-Aug-2015	18:00	22.5	83	85	Inactive	–	–
Kg-2015-10	K. gainesi	10-Aug-2015	24:00	21.9	99	184	Active	Reynoutria sachalinensis	–
Kg-2015-10	K. gainesi	11-Aug-2015	06:00	20.3	87	238	Active	–	–
Kg-2015-10	K. gainesi	11-Aug-2015	12:00	27.1	76	173	Inactive	Reynoutria sachalinensis	–
Kg-2015-10	K. gainesi	11-Aug-2015	18:00	22.4	87	137	Active	Urtica platyphylla	–
Kg-2015-10	K. gainesi	11-Aug-2015	24:00	20.1	95	191	Active	Reynoutria sachalinensis	Probably preying a living plant, Reynoutria sachalinensis
Kg-2015-10	K. gainesi	12-Aug-2015	06:00	20.5	94	197	Inactive	Filipendula camtschatica	–
Kg-2015-10	K. gainesi	12-Aug-2015	12:00	28.6	70	90	Inactive	Filipendula camtschatica	–
Kg-2015-10	K. gainesi	12-Aug-2015	18:00	17.6	98	185	Active	Filipendula camtschatica	–
Kg-2015-10	K. gainesi	12-Aug-2015	24:00	16.3	90	123	Active	Filipendula camtschatica	–
Kg-2015-10	K. gainesi	13-Aug-2015	06:00	17.3	93	72	Active	–	–
Kg-2015-10	K. gainesi	13-Aug-2015	12:00	24.8	80	130	Active	Angelica ursina	–
Kg-2015-10	K. gainesi	13-Aug-2015	18:00	26.5	66	197	Inactive	Reynoutria sachalinensis	–
Kg-2015-10	K. gainesi	13-Aug-2015	24:00	19.0	83	230	Inactive	Maianthemum japonicum	–

## Sheet: TableA5
Table A5. Explanatory variables, Df, residual deviance, AIC scores of each model.
Models	Explanatory variables			Df	Residual deviance	AIC
1) The ordinary condition model
Model 1	Species	Direction	Species:Direction	6	460.9	472.856
2) The stimulated condition model
Model 2	Categories	Temperature	Humidity	7	338.1	352.059
3) The exploration model
Model 3	Species	Time	Species:Time	19	3070.6	3108.57
4) The activity model
Model 4	Species	Time	Species:Time	9	388.5	406.518
